# Supplementary material for: African dust transported to Barbados in the Wintertime Lacks Indicators of Chemical Aging
Source: Copernicus journal article supplement (doi:10.5194/egusphere-2024-3288), 2024-10-30
Supplement: Supplementary file 1 [file egusphere-2024-3288-supplement.pdf]

## **Supporting Information: African dust transported to Barbados in the Wintertime Lacks Indicators of Chemical Aging**

Haley M. Royer<sup>1,2</sup>, Michael Sheridan<sup>1,3</sup>, Nurun Nahar Lata<sup>4</sup>, Zezhen Cheng<sup>4</sup>, Swarup China<sup>4</sup>, Zihua Zhu<sup>4</sup>, Hope Elliott<sup>1</sup>, Andrew P. Ault<sup>5</sup>, Cassandra Gaston<sup>1\*</sup>

<sup>1</sup>Department of Atmospheric Sciences, Rosenstiel School of Marine, Atmospheric, and Earth Science, University of Miami, Miami, FL

<sup>2</sup>Currently at: Department of Environmental Sciences and Engineering, University of North Carolina at Chapel Hill, Chapel Hill, NC

<sup>3</sup>Department of Marine Sciences, Franklin College of Arts and Sciences, University of Georgia, Athens, GA

<sup>4</sup>Environmental Molecular Sciences Laboratory, Pacific Northwest National Laboratory, Richland, WA

<sup>5</sup>Department of Chemistry, University of Michigan, Ann Arbor, MI

\*Corresponding Author:

Cassandra J. Gaston: Email: [cgaston@miami.edu](mailto:cgaston@miami.edu), Phone: (305)-421-4979

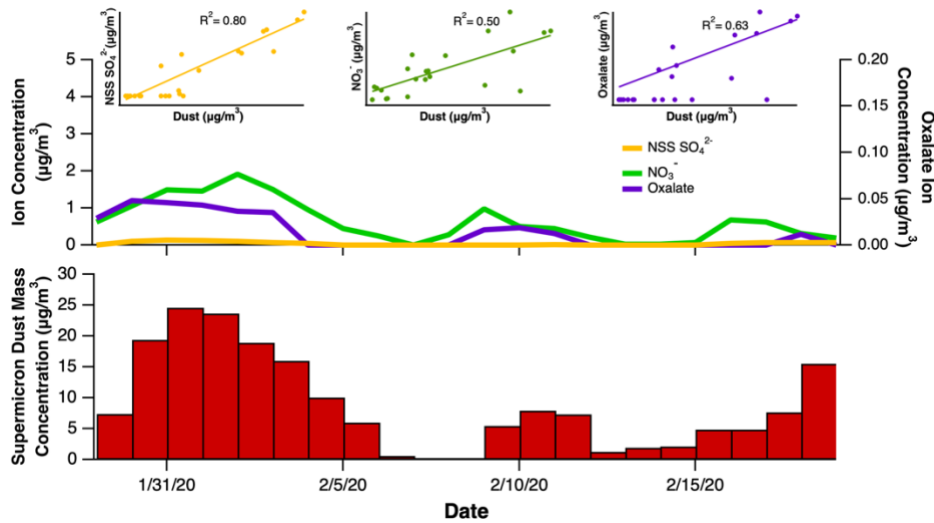

Figure S1 – Daily soluble ion content for supermicron nitrate (left axis; green), non-sea salt sulfate (left axis; yellow), and oxalate (right axis; purple) with correlation plots for each ion as a function of dust mass concentrations a) and daily supermicron dust mass concentrations b) determined for the entire sampling period. Correlation plots include all data, including data from samples with undetectable ions. Trendlines are plotted only for data with detectable dust and ions.

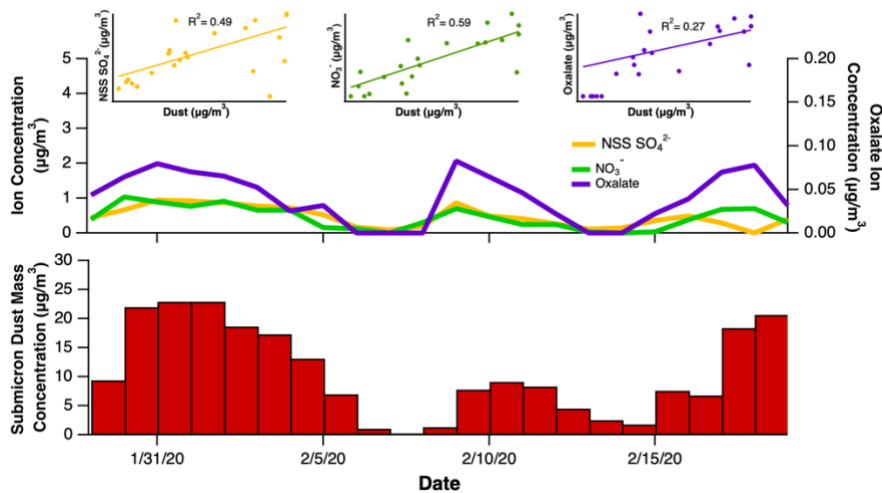

Figure S2 - Daily soluble ion content for submicron nitrate (left axis; green), non-sea salt sulfate (left axis; yellow), and oxalate (right axis; purple) with correlation plots for each ion as a function of dust mass concentrations a) and daily submicron dust mass concentrations b) determined for the entire sampling period. Correlation plots include all data, including data from samples with undetectable ions. Trendlines are plotted only for data with detectable dust and soluble ions.

| Particle Type | Average N (%) |               |               |
|---------------|---------------|---------------|---------------|
|               | Submicron     | Supermicron   | Total         |
| Dust          | 1.9 $\pm$ 0.6 | 2.1 $\pm$ 0.3 | 2.0 $\pm$ 0.5 |
| Dust+Smoke    | 2.5 $\pm$ 0.4 | 2.6 $\pm$ 0.3 | 2.6 $\pm$ 0.4 |
| Dust+SeaSalt  | 1.9 $\pm$ 0.7 | 2.2 $\pm$ 0.1 | 2.0 $\pm$ 0.5 |
| Sea Salt      | 1.9 $\pm$ 0.7 | 3.0 $\pm$ 0.9 | 2.4 $\pm$ 0.9 |

Table S1 – Values of average N content in individual particles of dust, internally mixed dust & smoke, internally mixed dust and sea salt, and sea salt particles in the submicron, supermicron, and total size distribution.

| Particle Type | Average Particle Fraction w/ Detectable N (%) |             |             |
|---------------|-----------------------------------------------|-------------|-------------|
|               | Submicron                                     | Supermicron | Total       |
| Dust          | 36 $\pm$ 25                                   | 76 $\pm$ 12 | 52 $\pm$ 28 |
| Dust+Smoke    | 70 $\pm$ 17                                   | 95 $\pm$ 5  | 79 $\pm$ 19 |
| Dust+SeaSalt  | 43 $\pm$ 19                                   | 75 $\pm$ 14 | 59 $\pm$ 23 |
| Sea Salt      | 23 $\pm$ 16                                   | 38 $\pm$ 9  | 30 $\pm$ 15 |

Table S2 – Values of Average particle fractions with detectable N in dust, internally mixed dust & smoke, internally mixed dust and sea salt, and sea salt particles in the submicron, supermicron, and total size distribution.

| Particle Type | Average S (%) |               |               |
|---------------|---------------|---------------|---------------|
|               | Submicron     | Supermicron   | Total         |
| Dust          | 3.3 $\pm$ 2.8 | 1.9 $\pm$ 1.0 | 2.7 $\pm$ 0.5 |
| Dust+Smoke    | 1.9 $\pm$ 0.3 | 1.5 $\pm$ 0.8 | 1.7 $\pm$ 0.5 |
| Dust+SeaSalt  | 2.7 $\pm$ 1.0 | 2.0 $\pm$ 0.2 | 2.4 $\pm$ 0.9 |
| Sea Salt      | 2.8 $\pm$ 1.3 | 2.3 $\pm$ 0.2 | 2.6 $\pm$ 1.1 |

Table S3 - Values of average S content in individual particles of dust, internally mixed dust & smoke, internally mixed dust and sea salt, and sea salt particles in the submicron, supermicron, and total size distribution.

| Particle Type | Average Particle Fraction w/ Detectable S (%) |             |             |
|---------------|-----------------------------------------------|-------------|-------------|
|               | Submicron                                     | Supermicron | Total       |
| Dust          | 8 $\pm$ 7                                     | 14 $\pm$ 15 | 10 $\pm$ 12 |
| Dust+Smoke    | 44 $\pm$ 15                                   | 20 $\pm$ 11 | 35 $\pm$ 18 |
| Dust+SeaSalt  | 28 $\pm$ 9                                    | 35 $\pm$ 19 | 31 $\pm$ 16 |
| Sea Salt      | 36 $\pm$ 22                                   | 87 $\pm$ 10 | 58 $\pm$ 31 |

Table S2 – Values of Average particle fractions with detectable N in dust, internally mixed dust & smoke, internally mixed dust and sea salt, and sea salt particles in the submicron, supermicron, and total size distribution.

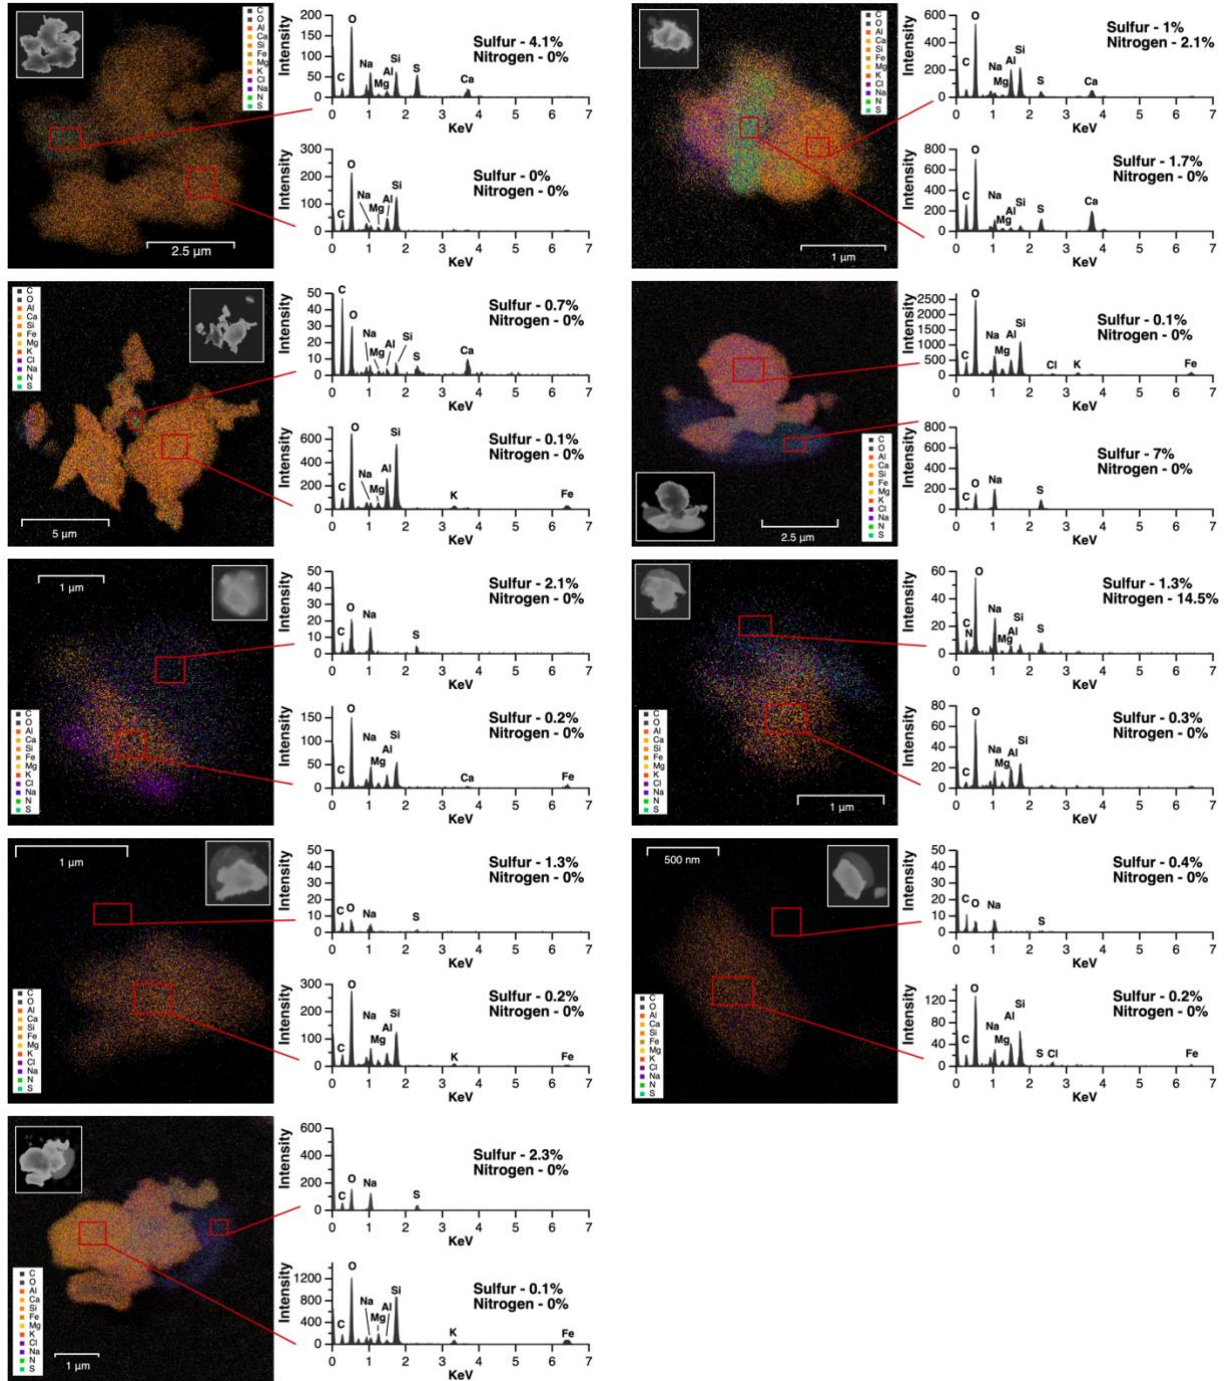

Figure S3 – Elemental maps of internally mixed dust and sea salt particles determined using SEM/EDX. Red box represents where EDX analysis occurred on the particle.

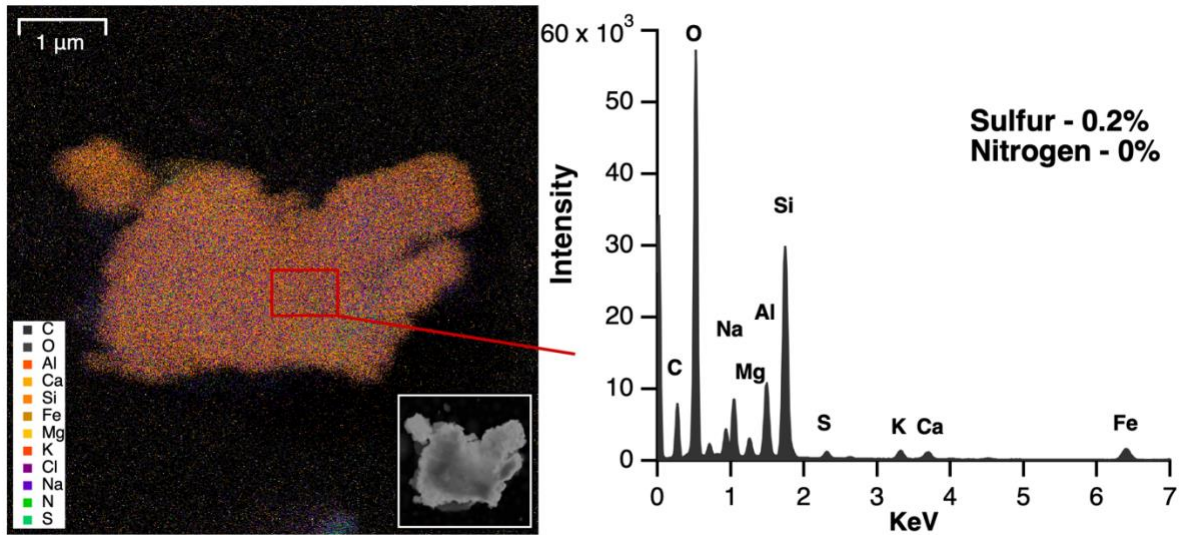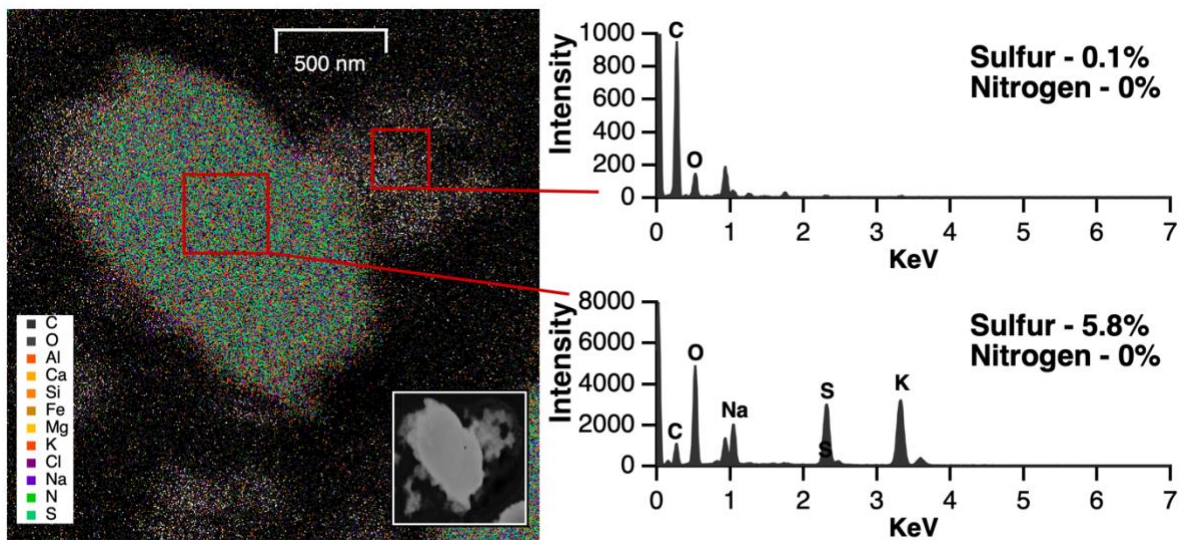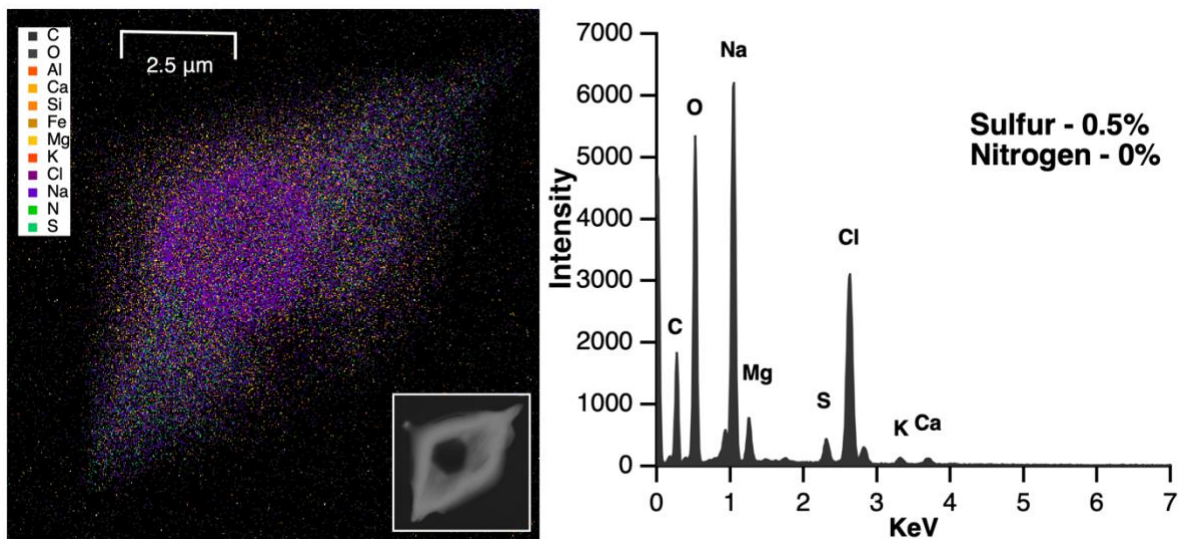

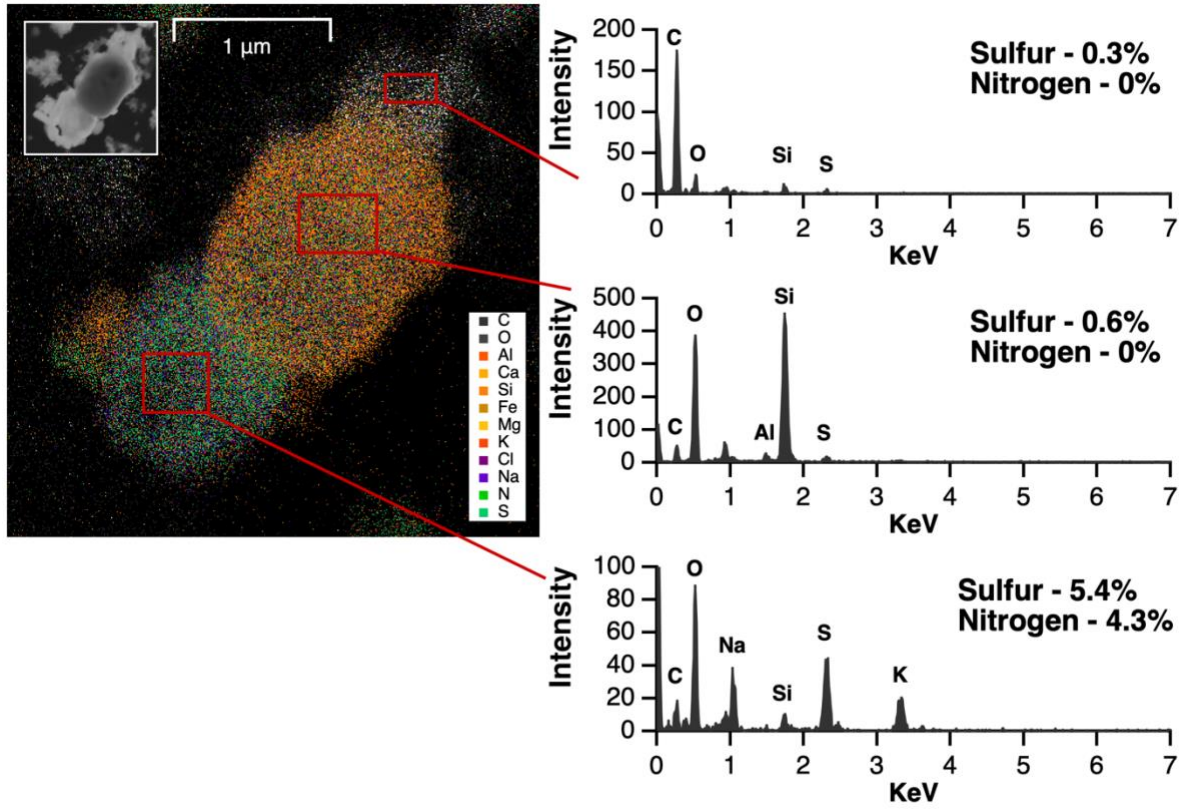

Figure S4 – Elemental maps and corresponding EDX spectra for a dust particle, smoke particle, sea salt particle, and internally mixed dust and sea salt particle.
